# Supplementary material for: The version 3 OMI NO 2 standard product
Source: Copernicus journal article supplement (doi:10.5194/amt-10-3133-2017), 2017-09-01
Supplement: Supplementary file 1 [file amt-10-3133-2017-supplement.pdf]

Supplement of Atmos. Meas. Tech., 10, 3133–3149, 2017  
<https://doi.org/10.5194/amt-10-3133-2017-supplement>  
© Author(s) 2017. This work is distributed under  
the Creative Commons Attribution 3.0 License.

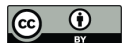

*Supplement of*

## **The version 3 OMI NO<sub>2</sub> standard product**

**Nickolay A. Krotkov et al.**

*Correspondence to:* Nickolay A. Krotkov ([nickolay.a.krotkov@nasa.gov](mailto:nickolay.a.krotkov@nasa.gov))

The copyright of individual parts of the supplement might differ from the CC BY 3.0 License.

## Supplementary Material

Figure S1. OMI NO<sub>2</sub> VCD SPv3 and SPv3-SPv2 difference monthly maps for July 2006

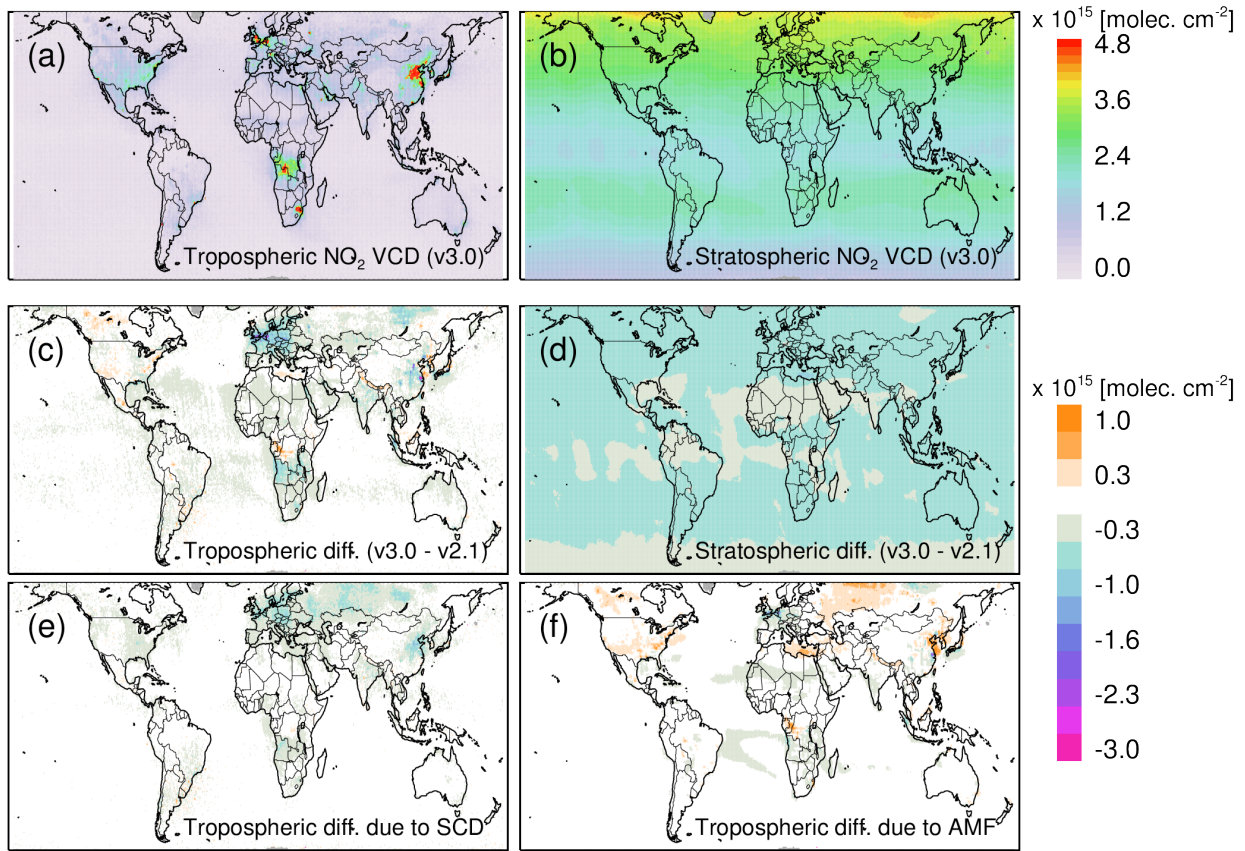

**Figure S1.** OMI NO<sub>2</sub> maps (a, b) and difference maps (c, d) for July 2006: tropospheric VCD, ( $V_{\text{trop}}$ : c) and stratospheric VCD ( $V_{\text{strat}}$ : d). Bottom row: change in  $V_{\text{trop}}$  due to new SCD only (e), and change in  $V_{\text{trop}}$  due to new *a-priori* NO<sub>2</sub> profile shapes only (f).
